# Supplementary material for: Pilot testing of an adaptive, individualized inhibitory control training for binge drinking: first evidence on feasibility, acceptance, and efficacy
Source: Springer Nature journal article supplement (doi:10.1007/s00426-022-01725-4), 2022-08-22
Supplement: MOESM1 [file 23391244]

**Pilot testing of an adaptive, individualized inhibitory control training for binge drinking:  
first evidence on feasibility, acceptance, and efficacy**

Daniela Reichl<sup>1</sup>, Niklas Enewoldsen<sup>1</sup>, Astrid Müller<sup>2</sup>, Sabine Steins-Loeber<sup>1</sup>

<sup>1</sup> Department of Clinical Psychology and Psychotherapy, Otto-Friedrich University Bamberg,  
Bamberg, Germany

<sup>2</sup> Department of Psychosomatic Medicine and Psychotherapy, Hannover Medical School,  
Hannover, Germany

Journal: Psychological Research

Address of correspondence:

Daniela Reichl

Otto-Friedrich University Bamberg

Markusplatz 3

96047 Bamberg

GERMANY

Email: [daniela.reichl@uni-bamberg.de](mailto:daniela.reichl@uni-bamberg.de).

**ESM1.** Results of the ANCOVAs regarding the effect of time and/or group after controlling for sex or age

For commission errors, the ANCOVA revealed no interaction time\*sex,  $F(1,57)=0.780$ ,  $p=.381$ ,  $\eta^2=.013$ , of group\*sex,  $F(1,57)=0.072$ ,  $p=.789$ ,  $\eta^2=.001$ , time\*group\*sex,  $F(1,57)=0.247$ ,  $p=.621$ ,  $\eta^2=.004$ , or time\*group\*sex\*part,  $F(1,57)=0.904$ ,  $p=.346$ ,  $\eta^2=.016$ . The effects of group,  $F(1,57)=0.660$ ,  $p=.420$ ,  $\eta^2=.011$ , time,  $F(1,57)=0.057$ ,  $p=.812$ ,  $\eta^2=.001$ , and time\*group,  $F(1,57)=0.234$ ,  $p=.630$ ,  $\eta^2=.004$ , and time\*group\*part,  $F(1,57)=0.003$ ,  $p=.954$ ,  $\eta^2=.000$ , did not change.

For relative commission errors regarding shapes, the ANCOVA revealed no interaction time\*sex,  $F(4,116)=0.554$ ,  $p=.696$ ,  $\eta^2=.019$ . The effect of time,  $F(4,116)=1.581$ ,  $p=.184$ ,  $\eta^2=.052$ , did not change.

For relative commission errors regarding alcohol, the ANCOVA revealed no interaction time\*sex,  $F(4,116)=0.746$ ,  $p=.563$ ,  $\eta^2=.025$ . The effect of time,  $F(4,116)=1.626$ ,  $p=.172$ ,  $\eta^2=.053$ , did not change.

For the intention to control drinking, the ANCOVA revealed no interaction time\*age,  $F(1,58)=0.530$ ,  $p=.470$ ,  $\eta^2=.009$ . The effects of group,  $F(1,58)=3.750$ ,  $p=.058$ ,  $\eta^2=.061$ , and time\*group,  $F(1,58)=3.029$ ,  $p=.087$ ,  $\eta^2=.050$ , did not change. Only, the effect of time was no longer significant,  $F(1,58)=1.371$ ,  $p=.246$ ,  $\eta^2=.023$ .
